# Supplementary material for: Spray nozzle for topical anaesthesia during flexible bronchoscopy: a randomised controlled trial
Source: PubMed Central journal article supplement — ERJ Open Res. 2024 Mar 11;10(2):00913-2023. doi: 10.1183/23120541.00913-2023 (PMC10926006; doi:10.1183/23120541.00913-2023), 2024-03-11
Supplement: 00913-2023.SUPPLEMENT.pdf [file 00913-2023.SUPPLEMENT.pdf]

**Supplementary Figures**

**Figure E1. The spray catheter**

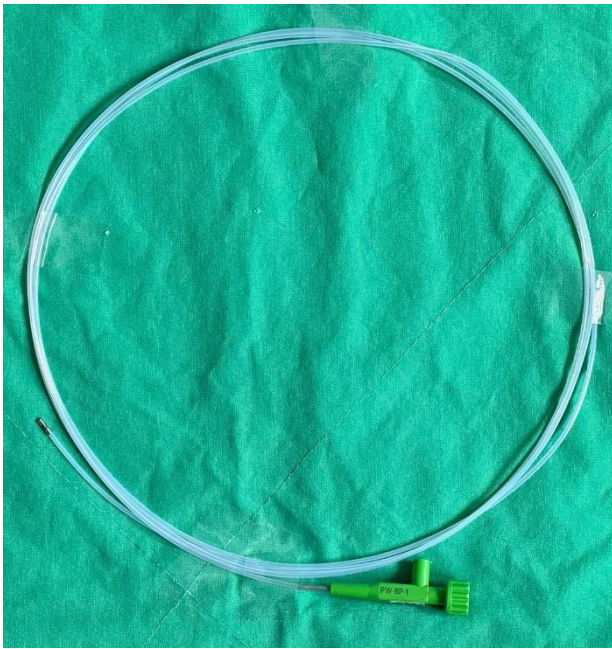

**Figure E2. The spray nozzle over the tip of the catheter**

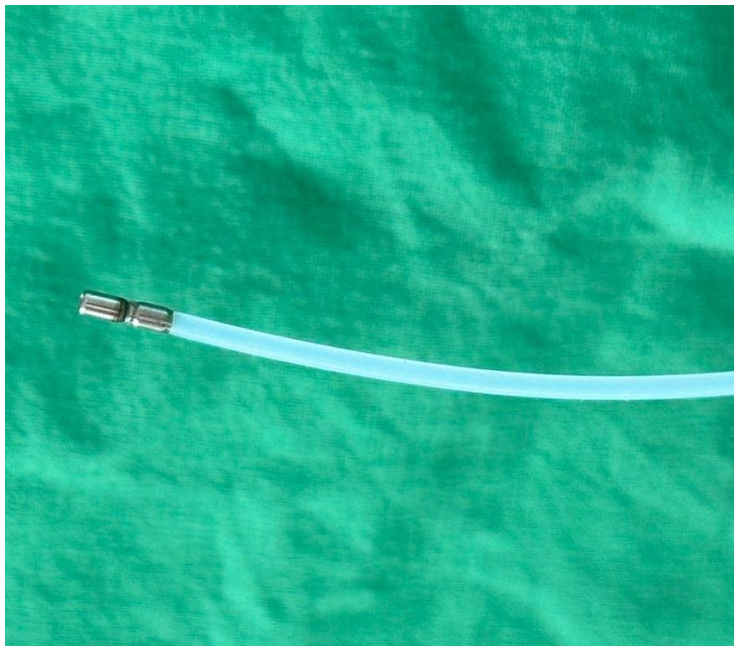

**Figure E3. The spray catheter inserted through the working channel of the bronchoscope**

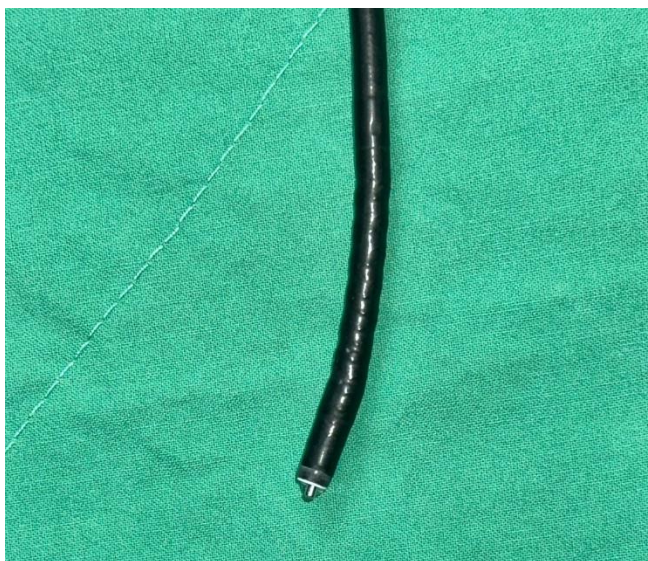

**Figure E4. Lidocaine delivered through the spray nozzle**

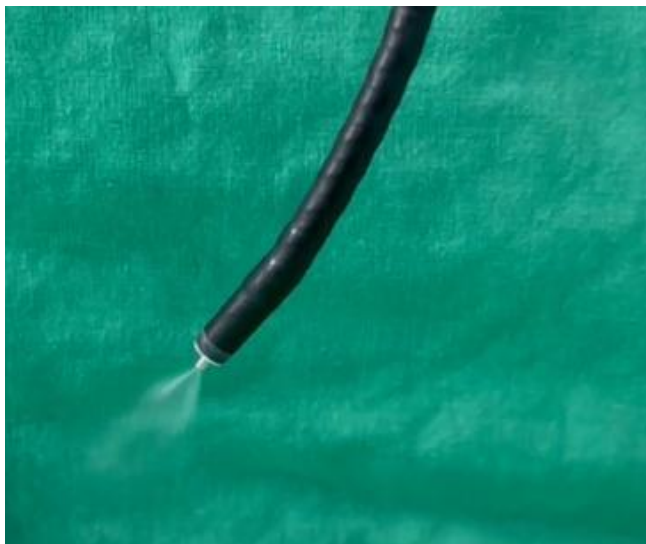

**Supplementary Tables**

**Table E1. Questionnaire (Patient)**

**Please circle the most appropriate statement relative to your experience with bronchoscopy**

| <b>After bronchoscopy</b>                |                      |                        |               |
|------------------------------------------|----------------------|------------------------|---------------|
| Discomfort from oropharyngeal anesthesia | None                 | 0 1 2 3 4 5 6 7 8 9 10 | Worst         |
| Discomfort during bronchoscopy           | None                 | 0 1 2 3 4 5 6 7 8 9 10 | Worst         |
| Cough during the procedure               | None                 | 0 1 2 3 4 5 6 7 8 9 10 | Worst         |
| Tolerance of the procedure               | Zero                 | 0 1 2 3 4 5 6 7 8 9 10 | Excellent     |
| Overall rate of satisfaction             | Zero                 | 0 1 2 3 4 5 6 7 8 9 10 | 100%          |
| Consent to a re-examination              | Absolutely unwilling | 0 1 2 3 4 5 6 7 8 9 10 | Fully willing |

**Table E2. Questionnaire (Operator)**

**Please circle the most appropriate statement relative to your experience with bronchoscopy**

| <b>After bronchoscopy</b>               |      |   |   |   |   |   |   |   |   |   |   |    |       |
|-----------------------------------------|------|---|---|---|---|---|---|---|---|---|---|----|-------|
| Patient discomfort                      | None | 0 | 1 | 2 | 3 | 4 | 5 | 6 | 7 | 8 | 9 | 10 | Worst |
| Patient coughing during bronchoscopy    | None | 0 | 1 | 2 | 3 | 4 | 5 | 6 | 7 | 8 | 9 | 10 | Worst |
| Procedural interference due to coughing | None | 0 | 1 | 2 | 3 | 4 | 5 | 6 | 7 | 8 | 9 | 10 | Worst |
